# Supplementary material for: Vitamin C in Critically Ill Patients: An Updated Systematic Review and Meta-Analysis
Source: MDPI journal article supplement (doi:10.3390/nu13103564), 2021-10-12
Supplement: s1 [file s1]

## **Supplementary file S1. Electronic search details**

### **Vitamin C in critically ill patients: An Updated Systematic Review and Meta-analysis**

**Dhan Bahadur Shrestha, MD<sup>1</sup>, Pravash Budhathoki, MD<sup>2</sup>, Yub Raj Sedhai, MD<sup>3\*</sup>, Sujit Kumar Mandal, MBBS<sup>4</sup>, Shreeja Shikhrakar, MBBS<sup>5</sup>, Saurab Karki, MBBS<sup>6</sup>, Ram Kaji Baniya, MD<sup>7</sup> Markos G. Kashiouris, MD MPH<sup>8</sup>, Xian Qiao MD<sup>9</sup>, and Alpha A. Fowler, III, MD<sup>8</sup>**

*<sup>1</sup>Department of Internal Medicine, Mount Sinai Hospital, Chicago, IL, USA*

*<sup>2</sup>Department of Internal Medicine, Bronxcare Health System, Bronx, NY, USA*

*<sup>3</sup>Department of Internal Medicine, Division of Hospital Medicine, Virginia Commonwealth University, School of Medicine, Richmond, VA, USA*

*<sup>4</sup>Nepalese Army Institute of Health Sciences, Kathmandu, Nepal*

*<sup>5</sup>Kathmandu University School of Medical Sciences, Dhulikhel, Kavrepalanchok, Nepal*

*<sup>6</sup>Military Hospital, Itahari-4, Sunsari, Nepal*

*<sup>7</sup>Our Lady of the Lake Regional Medical Center, Baton Rouge, LA, USA*

*<sup>8</sup>Department of Internal Medicine, Pulmonary and Critical Care, Virginia Commonwealth University, School of Medicine, Richmond, VA, USA*

*<sup>9</sup>Department of Internal Medicine, Pulmonary and Critical Care, Eastern Virginia Medical School Norfolk, VA, USA*

## **Pubmed**

Hits: 884

("vitamin c" OR "ascorbic acid" OR "ascorbate") AND ("sepsis" OR "septic shock" OR "critical illness" OR "Intensive Care Unit" OR "ICU" OR "burn" OR "ARDS" OR "trauma")

<https://pubmed.ncbi.nlm.nih.gov/?term=%28%22vitamin+c%22+OR+%22ascorbic+acid%22+OR+%22ascorbate%22%29+AND+%28%22sepsis%22+OR+%22septic+shock%22+OR+%22critical+illness%22+OR+%22Intensive+Care+Unit%22+OR+%22ICU%22+OR+%22burn%22+OR+%22ARDS%22+OR+%22trauma%22%29>

## **Pubmed Central**

Hits: 15313

("vitamin c" OR "ascorbic acid" OR "ascorbate") AND ("sepsis" OR "septic shock" OR "critical illness" OR "Intensive Care Unit" OR "ICU" OR "burn" OR "ARDS" OR "trauma")

[https://www.ncbi.nlm.nih.gov/pmc/?term=\(%22vitamin+c%22+OR+%22ascorbic+acid%22+OR+%22ascorbate%22\)+AND+\(%22sepsis%22+OR+%22septic+shock%22+OR+%22critical+illness%22+OR+%22Intensive+Care+Unit%22+OR+%22ICU%22+OR+%22burn%22+OR+%22ARDS%22+OR+%22trauma%22\)](https://www.ncbi.nlm.nih.gov/pmc/?term=(%22vitamin+c%22+OR+%22ascorbic+acid%22+OR+%22ascorbate%22)+AND+(%22sepsis%22+OR+%22septic+shock%22+OR+%22critical+illness%22+OR+%22Intensive+Care+Unit%22+OR+%22ICU%22+OR+%22burn%22+OR+%22ARDS%22+OR+%22trauma%22))

## **Embase**

Hits: 112

Search:

<https://www.embase.com/#advancedSearch/resultspage/history.3/page.1/25.items/orderby.date/source>.

## **Scopus**

Hits: 2000

("vitamin c" OR "ascorbic acid" OR "ascorbate") AND ("sepsis" OR "septic shock" OR "critical illness" OR "Intensive Care Unit" OR "ICU" OR "burn" OR "ARDS" OR "trauma")

[https://www.scopus.com/results/results.uri?numberOfFields=0&src=s&clickedLink=&edit=&editSaveSearch=&origin=searchbasic&authorTab=&affiliationTab=&advancedTab=&scint=1&menu=search&tablin=&searchterm1=%28%22vitamin+c%22+OR+%22ascorbic+acid%22+OR+%22ascorbate%22%29+AND+%28%22sepsis%22+OR+%22septic+shock%22+OR+%22critical+illness%22+OR+%22Intensive+Care+Unit%22+OR+%22ICU%22+OR+%22burn%22+OR+%22ARDS%22+OR+%22trauma%22%29&field1=TITLE\\_ABS\\_KEY&dateType=Publication\\_Date\\_Type&yearFrom=Before+1960&yearTo=Present&loadDate=7&documenttype=All&accessTypes=All&r](https://www.scopus.com/results/results.uri?numberOfFields=0&src=s&clickedLink=&edit=&editSaveSearch=&origin=searchbasic&authorTab=&affiliationTab=&advancedTab=&scint=1&menu=search&tablin=&searchterm1=%28%22vitamin+c%22+OR+%22ascorbic+acid%22+OR+%22ascorbate%22%29+AND+%28%22sepsis%22+OR+%22septic+shock%22+OR+%22critical+illness%22+OR+%22Intensive+Care+Unit%22+OR+%22ICU%22+OR+%22burn%22+OR+%22ARDS%22+OR+%22trauma%22%29&field1=TITLE_ABS_KEY&dateType=Publication_Date_Type&yearFrom=Before+1960&yearTo=Present&loadDate=7&documenttype=All&accessTypes=All&r)

esetFormLink=&st1=%28%22vitamin+c%22+OR+%22ascorbic+acid%22+OR+%22ascorbate%22%29+AND+%28%22sepsis%22+OR+%22septic+shock%22+OR+%22critical+illness%22+OR+%22Intensive+Care+Unit%22+OR+%22ICU%22+OR+%22burn%22+OR+%22ARDS%22+OR+%22trauma%22%29&st2=&sot=b&sdt=b&sl=183&s=TITLE-ABS-KEY%28%28%22vitamin+c%22+OR+%22ascorbic+acid%22+OR+%22ascorbate%22%29+AND+%28%22sepsis%22+OR+%22septic+shock%22+OR+%22critical+illness%22+OR+%22Intensive+Care+Unit%22+OR+%22ICU%22+OR+%22burn%22+OR+%22ARDS%22+OR+%22trauma%22%29%29&sid=b0edf479bae139c7f8ea1d1d484d75bf&searchId=b0edf479bae139c7f8ea1d1d484d75bf&txGid=87a4a3b838c2a1b7cc17e330c7248561&sort=plf-f&originationType=b&rr=
