# Supplementary material for: Vitamin C in Critically Ill Patients: An Updated Systematic Review and Meta-Analysis
Source: Nutrients. 2021 Oct 12;13(10):3564. doi: 10.3390/nu13103564 (PMC8539952; doi:10.3390/nu13103564)
Supplement: Supplementary file 1 [file nutrients-13-03564-s001.zip]

Archive with 4 entries (4 files):
- Supplementary  file S1. Electronic search details.pdf
- Supplementary file S2. Basic study details.pdf
- Supplementary file S3. Additional analysis.pdf
- Supplementary file S4. PRISMA checklist.pdf
